# Supplementary material for: Synergistic effects of side-functionalization and aza-substitution on the charge transport and optical properties of perylene-based organic materials: a DFT study
Source: Royal Society of Chemistry journal article supplement (doi:10.1039/d1nj06084h), 2022-01-01
Supplement: d1nj06084h1.pdf [file d1nj06084h1.pdf]

# Synergistic effect of side-functionalization and aza-substitution on the charge transport and optical properties of perylene-based organic materials: A DFT study

Suryakanti Debata, Rudranarayan Khatua, Sridhar Sahu\*

High Performance Computing lab, Department of Physics, Indian Institute of Technology  
(Indian School of Mines) Dhanbad, India

E-mail: [sridharsahu@iitism.ac.in](mailto:sridharsahu@iitism.ac.in)

## Section S1. EA and IP calculations

The adiabatic/vertical electron affinities and ionization potentials (AEAs/AIPs and VEAs/VIPs) of the studied compounds can be calculated from the potential energy surfaces (Figure S1) as follows.

$$\begin{aligned} \text{AEA} &= E - E_- \\ \text{AIP} &= E_+ - E \\ \text{VEA} &= E - E^* \\ \text{VIP} &= E^* - E_- \\ &+ \end{aligned}$$

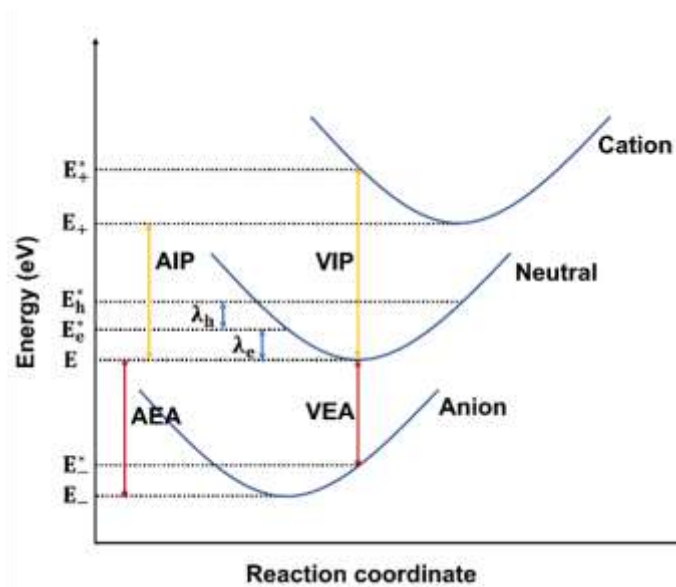

**Figure S1.** Schematic representation of potential energy surfaces of neutral and charged species of the organic semiconductors, used for calculating the internal hole/electron reorganization energies ( $\lambda_{h/e}$ ) using four-point method, adiabatic/vertical electron affinities and ionization potentials (AEAs/AIPs and VEAs/VIPs).

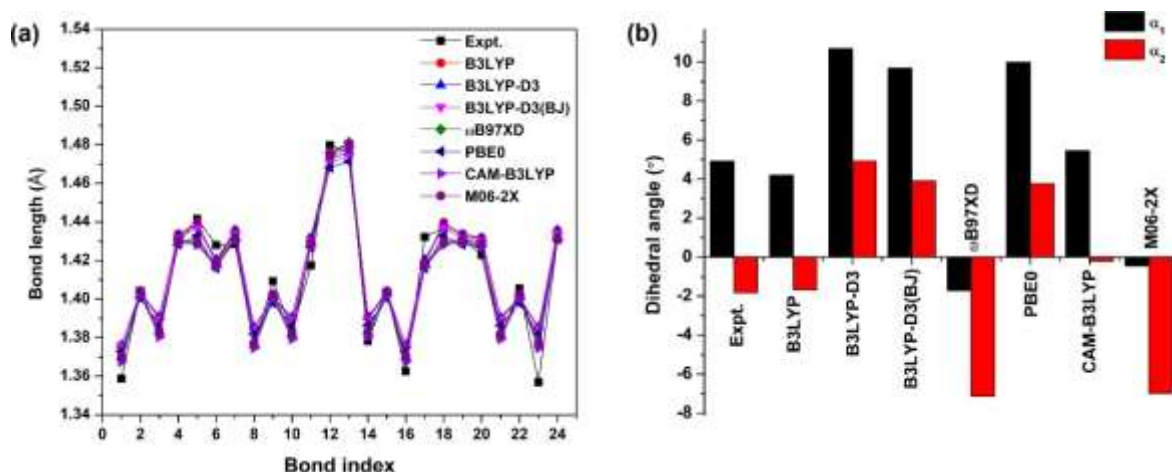

**Figure S2.** Deviation of geometrical parameters of **P1** at different levels of theory from the experimental values (a) bond lengths, and (b) dihedral angles.

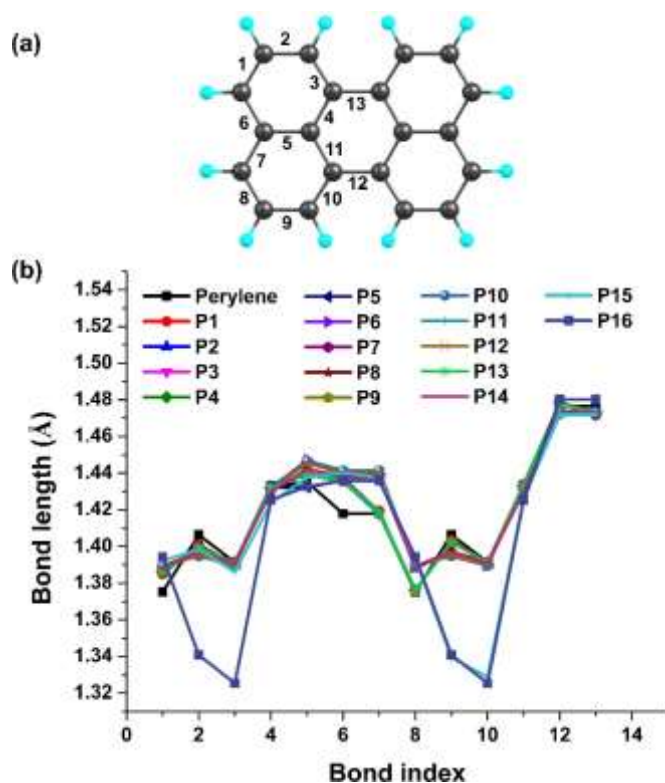

**Figure S3.** (a) optimized geometry of perylene using B3LYP/6-31G(d,p) method showing the selective bond labels, (b) bond-length deviations (in Å unit) at the selective sites of the studied compounds from the parent perylene structure upon side-substitution.

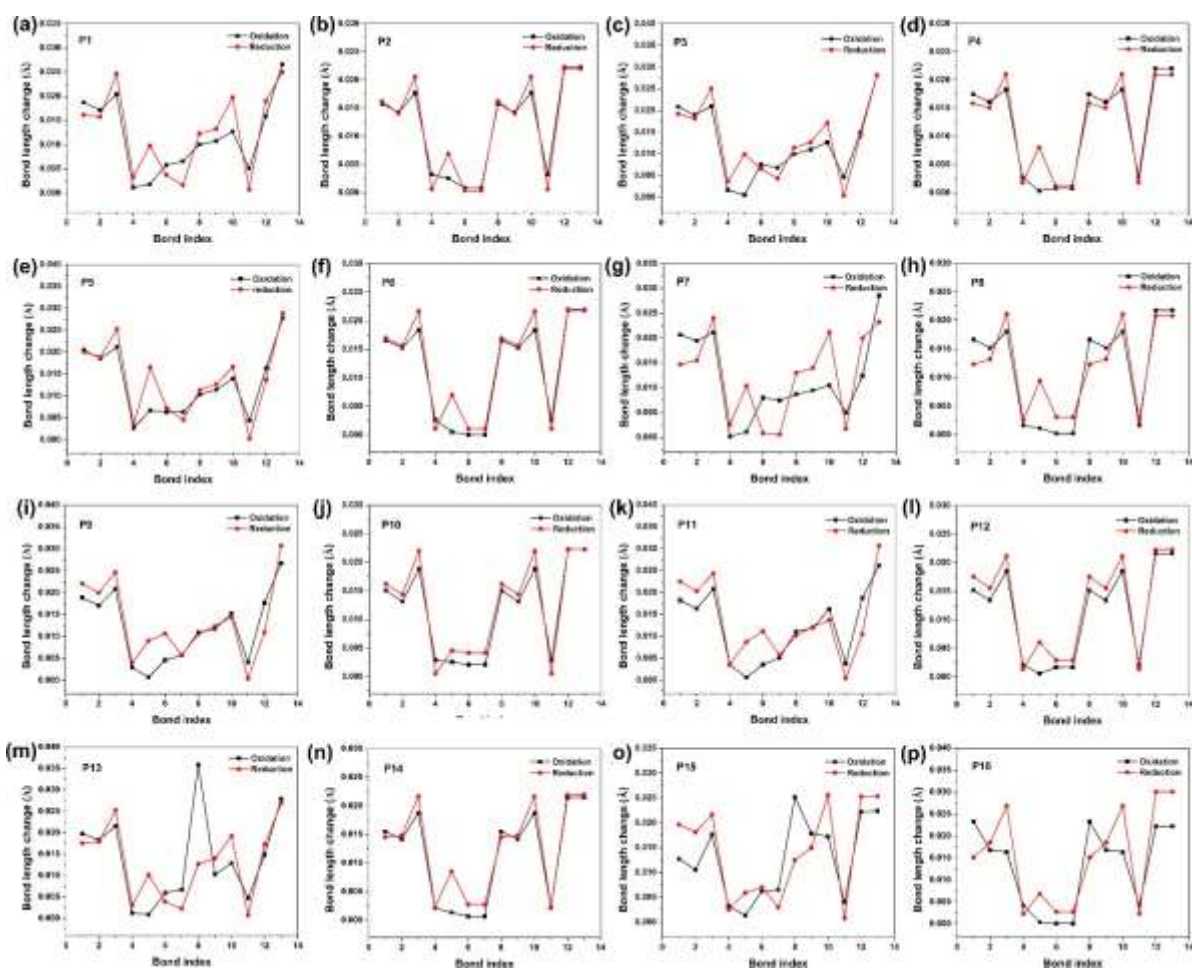

**Figure S4.** Bond-length changes (in Å unit) in the studied compounds during charge transfer.

**Table S1.** Unit-cell parameters of the crystals of perylene derivatives.

| Compound | Crystal system | Space group                                     | Packing motif     | a     | b<br>(Å) | c     | $\alpha$ | $\beta$<br>(°) | $\gamma$ |
|----------|----------------|-------------------------------------------------|-------------------|-------|----------|-------|----------|----------------|----------|
| P1 [S1]  | Orthorhombic   | <i>Pbca</i>                                     | Brick wall layer  | 12.51 | 35.54    | 16.82 | 90.0     | 90.0           | 90.0     |
| P2 [S1]  | Orthorhombic   | <i>Pbca</i>                                     | Herringbone       | 9.80  | 19.17    | 38.31 | 90.0     | 90.0           | 90.0     |
| P3       | Orthorhombic   | <i>Pbca</i>                                     | Herringbone       | 29.78 | 7.78     | 19.89 | 90.0     | 90.0           | 90.0     |
| P4       | Monoclinic     | <i>Cc</i>                                       | Brick wall layer  | 16.76 | 17.11    | 12.59 | 90.0     | 107.1          | 90.0     |
| P5       | Orthorhombic   | <i>Pna2<sub>1</sub></i>                         | Herringbone       | 7.01  | 8.82     | 36.10 | 90.0     | 90.0           | 90.0     |
| P6       | Monoclinic     | <i>P2<sub>1</sub>/c</i>                         | Brick wall layer  | 16.17 | 21.16    | 9.86  | 90.0     | 101.1          | 90.0     |
| P7       | Orthorhombic   | <i>P2<sub>1</sub>2<sub>1</sub>2<sub>1</sub></i> | Brick wall layer  | 35.05 | 6.95     | 9.05  | 90.0     | 90.0           | 90.0     |
| P8       | Orthorhombic   | <i>Pbca</i>                                     | Herringbone       | 29.61 | 10.98    | 18.98 | 90.0     | 90.0           | 90.0     |
| P9       | Orthorhombic   | <i>Pbca</i>                                     | Cofacial stacking | 41.78 | 16.16    | 7.39  | 90.0     | 90.0           | 90.0     |
| P10      | Orthorhombic   | <i>Pbca</i>                                     | Herringbone       | 25.41 | 13.22    | 23.00 | 90.0     | 79.16          | 90.0     |
| P11      | Orthorhombic   | <i>P2<sub>1</sub>2<sub>1</sub>2<sub>1</sub></i> | Cofacial stacking | 4.28  | 34.81    | 16.31 | 90.0     | 90.0           | 90.0     |
| P12      | Orthorhombic   | <i>Pbca</i>                                     | Herringbone       | 24.54 | 13.17    | 22.55 | 90.0     | 90.0           | 90.0     |
| P13      | Orthorhombic   | <i>Pbca</i>                                     | Herringbone       | 10.01 | 7.67     | 61.70 | 90.0     | 90.0           | 90.0     |
| P14      | Orthorhombic   | <i>Pbca</i>                                     | Herringbone       | 17.76 | 31.22    | 12.42 | 90.0     | 90.0           | 90.0     |
| P15      | Orthorhombic   | <i>P2<sub>1</sub>2<sub>1</sub>2<sub>1</sub></i> | Herringbone       | 13.01 | 11.74    | 22.81 | 90.0     | 90.0           | 90.0     |
| P16      | Orthorhombic   | <i>P2<sub>1</sub>2<sub>1</sub>2<sub>1</sub></i> | Herringbone       | 22.98 | 11.68    | 12.86 | 90.0     | 90.0           | 90.0     |

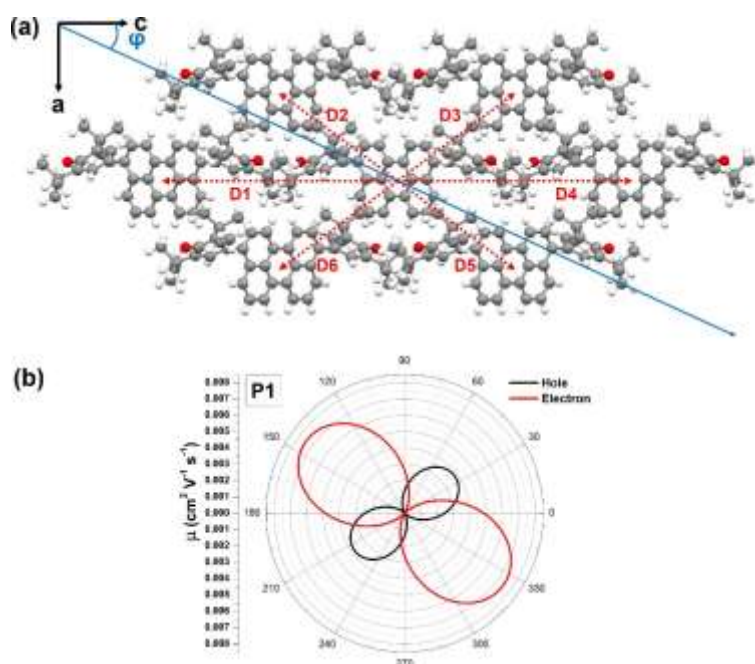

**Figure S5.** (a) Molecular crystal packing with illustration of different hopping pathways, and (b) anisotropic hole and electron mobilities of P1.

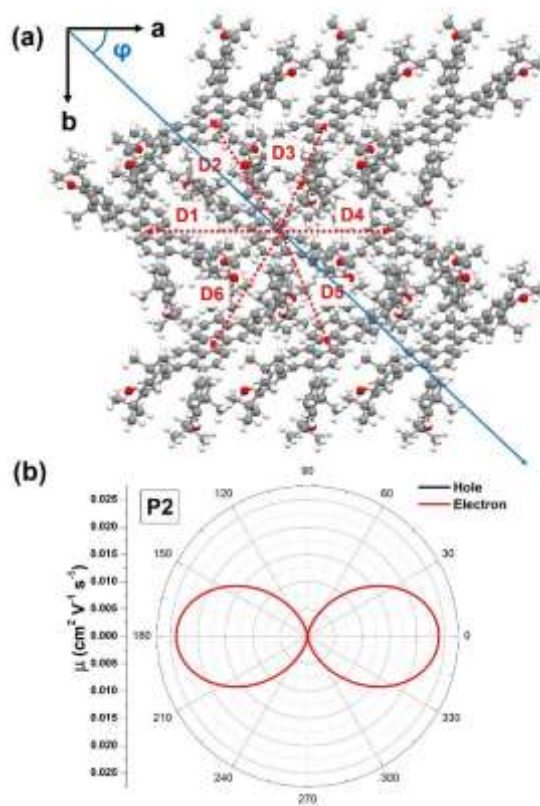

**Figure S6.** (a) Molecular crystal packing with illustration of different hopping pathways, and (b) anisotropic hole and electron mobilities of P2.

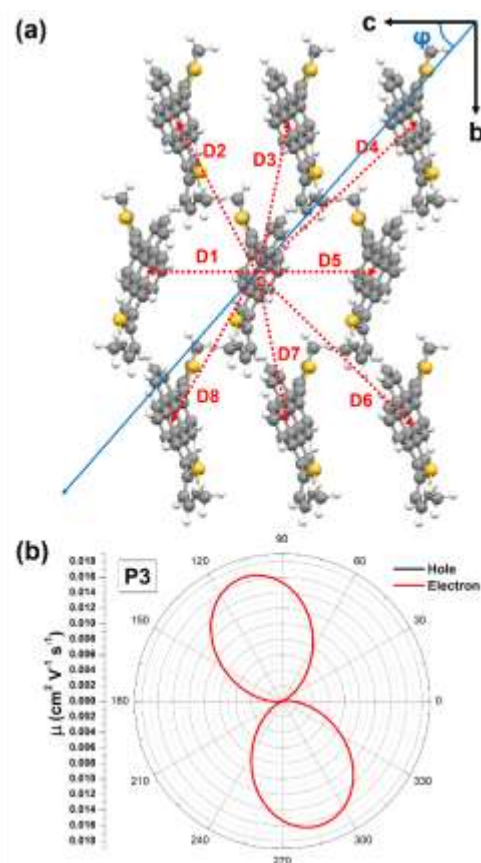

**Figure S7.** (a) Molecular crystal packing with illustration of different hopping pathways, and (b) anisotropic hole and electron mobilities of P3.

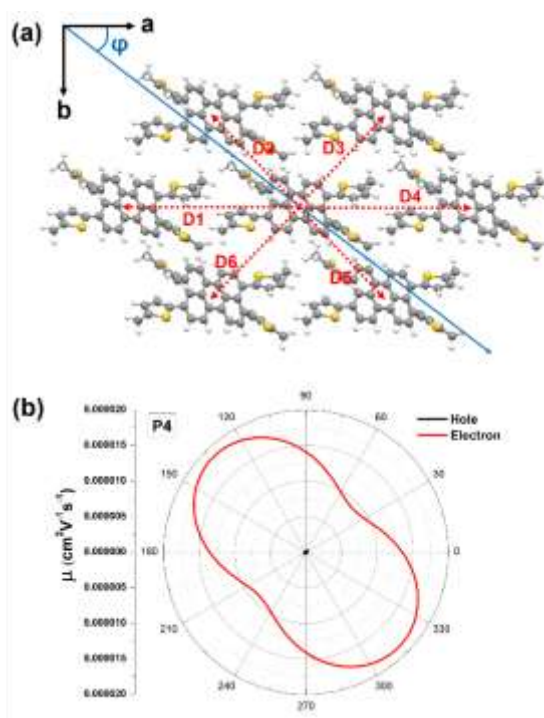

**Figure S8.** (a) Molecular crystal packing with illustration of different hopping pathways, and (b) anisotropic hole and electron mobilities of P4.

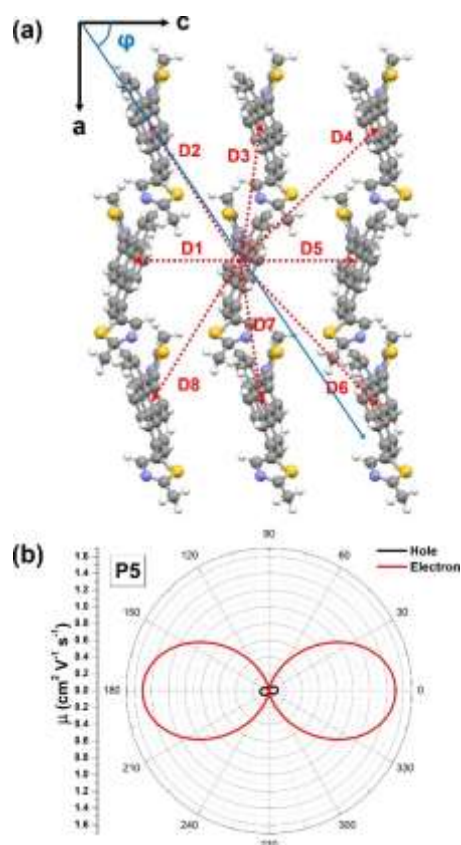

**Figure S9.** (a) Molecular crystal packing with illustration of different hopping pathways, and (b) anisotropic hole and electron mobilities of P5.

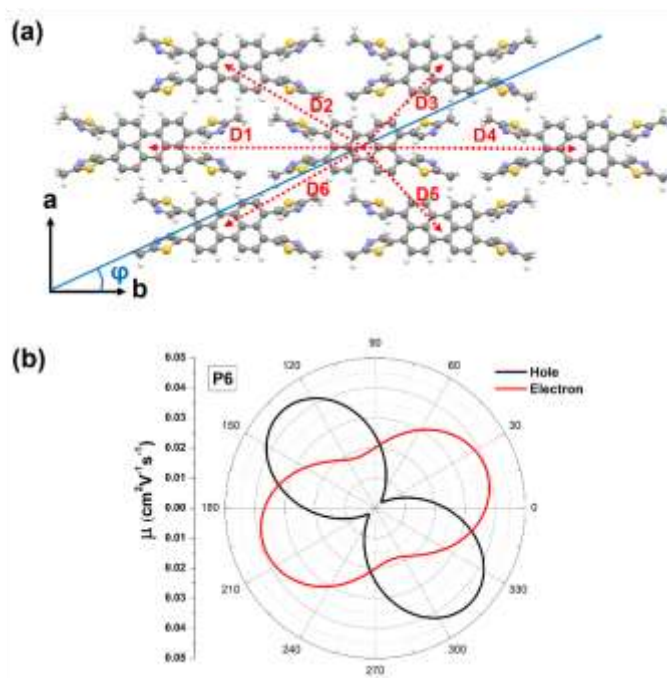

**Figure S10.** (a) Molecular crystal packing with illustration of different hopping pathways, and (b) anisotropic hole and electron mobilities of P6.

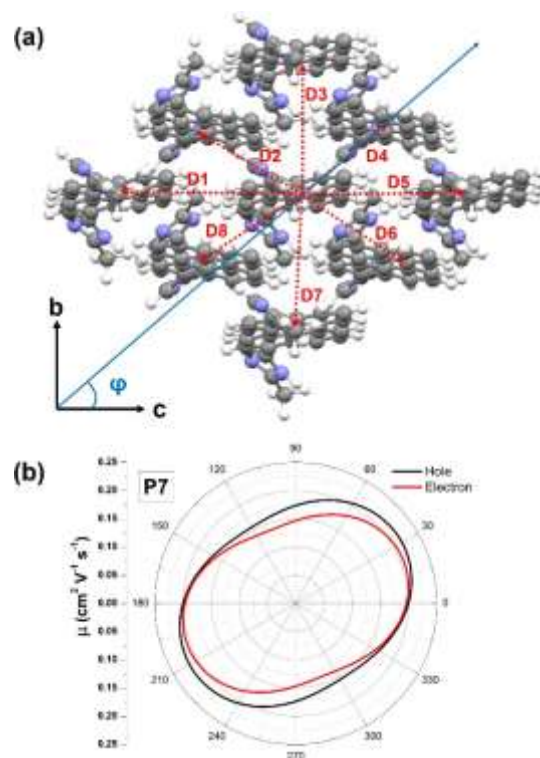

**Figure S11.** (a) Molecular crystal packing with illustration of different hopping pathways, and (b) anisotropic hole and electron mobilities of P7.

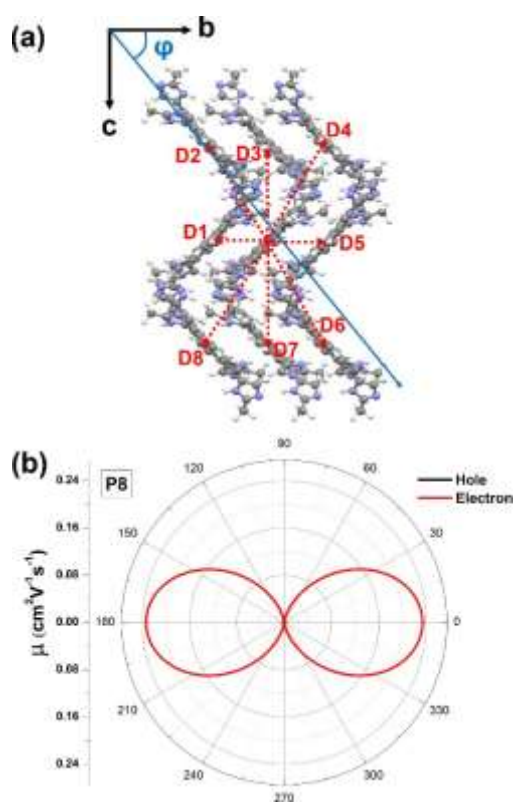

**Figure S12.** (a) Molecular crystal packing with illustration of different hopping pathways, and (b) anisotropic hole and electron mobilities of P8.

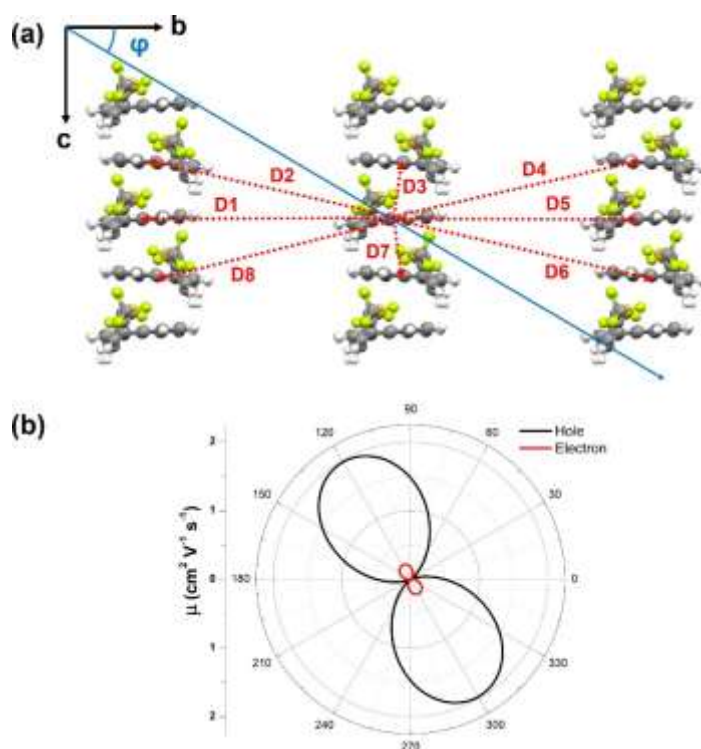

**Figure S13.** (a) Molecular crystal packing with illustration of different hopping pathways, and (b) anisotropic hole and electron mobilities of P9.

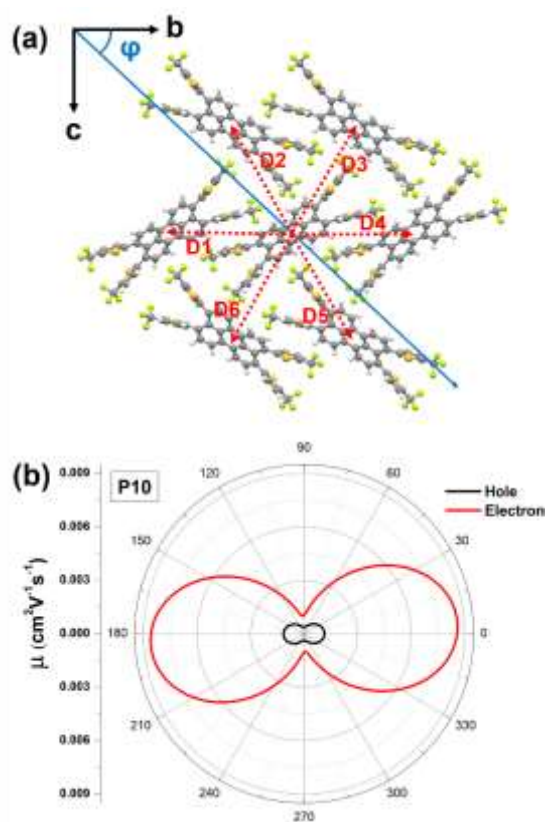

**Figure S14.** (a) Molecular crystal packing with illustration of different hopping pathways, and (b) anisotropic hole and electron mobilities of P10.

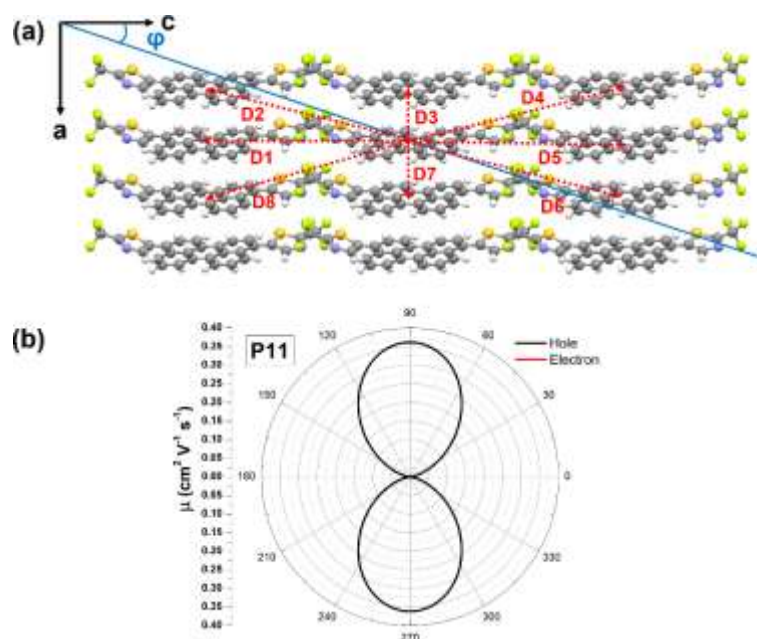

**Figure S15.** (a) Molecular crystal packing with illustration of different hopping pathways, and (b) anisotropic hole and electron mobilities of P11.

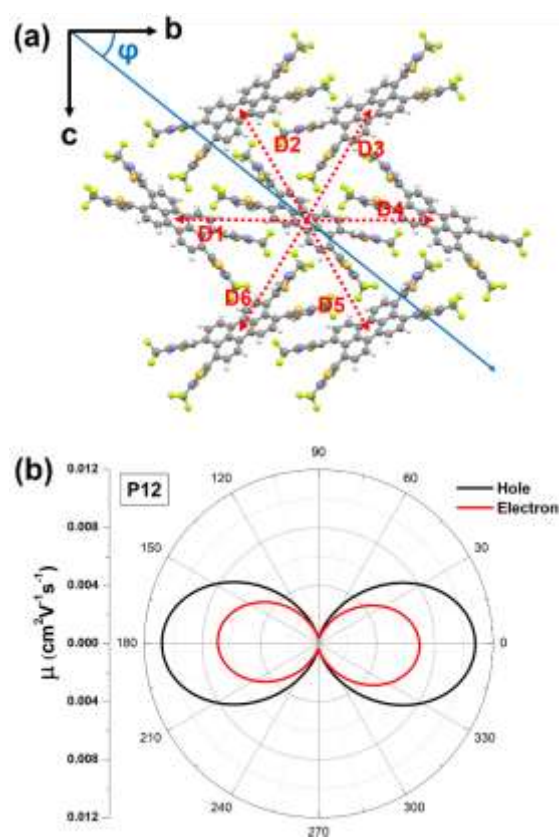

**Figure S16.** (a) Molecular crystal packing with illustration of different hopping pathways, and (b) anisotropic hole and electron mobilities of P12.

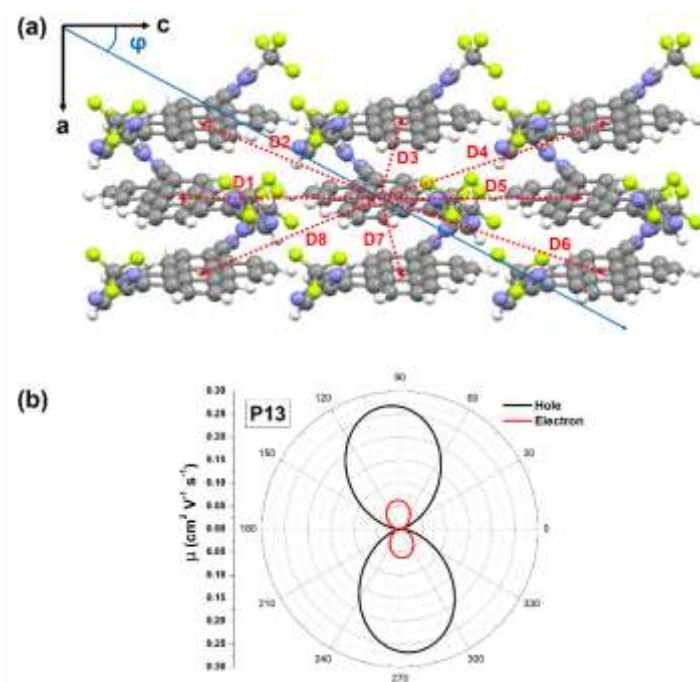

**Figure S17.** (a) Molecular crystal packing with illustration of different hopping pathways, and (b) anisotropic hole and electron mobilities of P13.

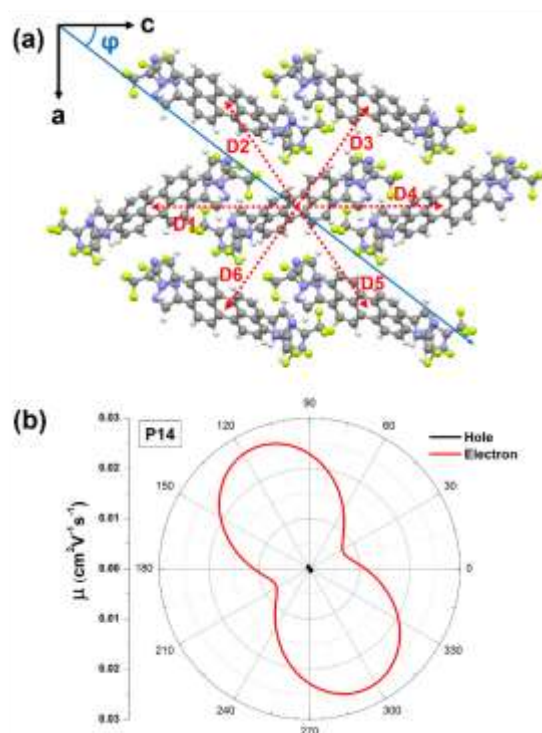

**Figure S18.** (a) Molecular crystal packing with illustration of different hopping pathways, and (b) anisotropic hole and electron mobilities of P14.

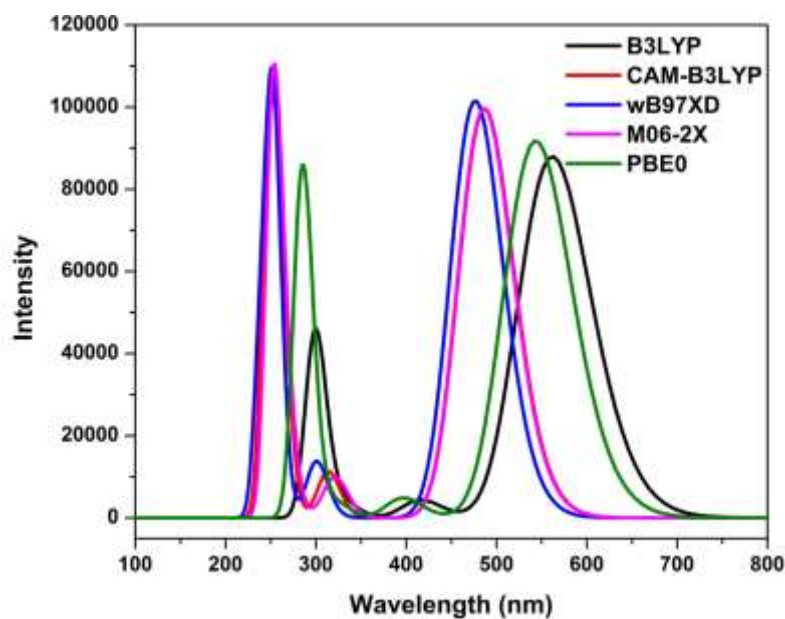

**Figure S19.** Benchmarking of TD-DFT method by comparing the absorption spectra of **P2** obtained with different exchange-correlation functionals.

## Reference

- S1. Y. Hirao, T. Okuda, Y. Hamamoto, T. Kubo, Formation of perylenes by oxidative dimerization of naphthalenes bearing radical sources, *ChemPlusChem* 2019, 84, 1–10.
